# Supplementary material for: Food Sources of Animal Protein in Relation to Overall and Cause-specific Mortality – causal Associations or Confounding? An Analyses of the EPIC-Heidelberg Cohort
Source: Preprints.org preprint supplement (doi:10.20944/preprints202307.0102.v1), 2023-07-03
Supplement: Supplementary file 1 [file supplementary]

**Supplementary table 1: Food items included in each food group**

| **Food group** | **Food items** |
| --- | --- |
| Red meat | Beef, veal, pork, mutton/lamb, horse, goat |
| Processed meat | Bacon, liver containing items, ham, hamburger, meatballs, minced meat, other processed meat (example: sausage, canned meat) |
| Poultry | Chicken, turkey, duck, goose, rabbit |
| Cheese | Ricotta, other cheeses (example: cheddar, gouda, camembert, mozzarella) |
| Milk | Whole milk, semi-skimmed milk, skimmed milk, non-specified milk, fermented milk |

**Supplementary Table 2: Types of cancer categories**

|  | Cancer sites | ICD-10 codes |
| --- | --- | --- |
| Strongly smoking-related cancer deaths | Oral cavity and pharynx | C001, C01, C021, C023, C030, C031, C040, C048, C049, C051, C069, C07, C080, C089, C098, C099, C102, C103, C108, C109, C12, C132, C138, C148 |
| esophagus | C150, C153, C154, C155, C158, C159, C14, C15 |
| larynx | C320, C321, C322, C328, C329 |
| Trachea, lung, bronchus | C33, C340, C3402, C341, C342, C343, C348, C349 |
| nose, nasal cavity, and middle ear | C300, C301, C310, C311, C319 |
| mediastinum and other respiratory organs | C383 |
| Strongly alcohol- and smoking related cancer deaths | Oral cavity and pharynx | C001, C01, C021, C023, C030, C031, C040, C048, C049, C051, C069, C07, C080, C089, C098, C099, C102, C103, C108, C109, C12, C132, C138, C148 |
| esophagus | C150, C153, C154, C155, C158, C159, C14, C15 |
| larynx | C320, C321, C322, C328, C329 |
